# Supplementary material for: Influenza A Virus Hemagglutinin Trimer, Head and Stem Proteins Identify and Quantify Different Hemagglutinin-Specific B Cell Subsets in Humans
Source: MDPI journal article supplement (doi:10.3390/vaccines9070717), 2021-07-02
Supplement: s1 [file s1]

Supplemental Figures corresponding to manuscript entitled:

# Influenza A virus hemagglutinin trimer, head, and stem proteins identify and quantify different hemagglutinin-specific B cell subsets in humans

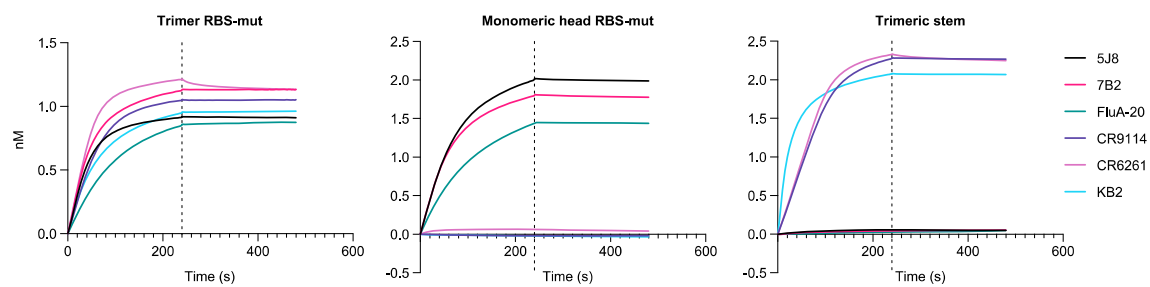

**Figure S1: Optical biosensor antibody binding patterns for HA-trimer, monomeric head, and trimeric stem.** Non-biotinylated HA-trimer, monomeric head, and trimeric stem proteins were immobilized on an optical biosensor until the threshold of 1 nM was reached. Several well-characterized head and stem mAbs were loaded in a concentration of 5  $\mu\text{g/mL}$ . 5J8, 7B2, and FluA-20 are head specific mAbs and CR9114, CR6261, and KB2 are stem specific mAbs. Association and dissociation steps were set at 240 s for each mAb, indicated by the dotted line.

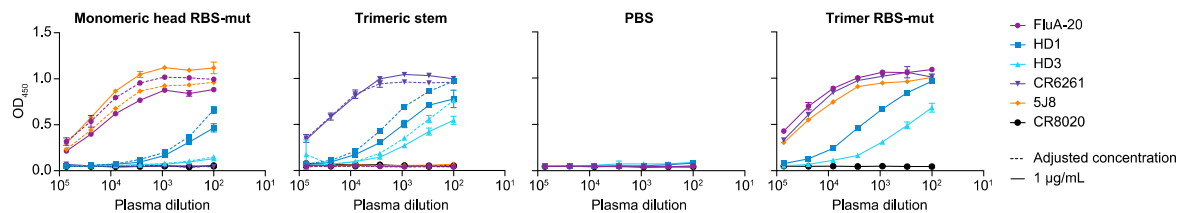

**Figure S2: Influence of different protein concentration coating on plasma and mAb responses.** Strep-Tactin XT ELISA plates coated with HA-trimer (1.0  $\mu\text{g/mL}$ ), monomeric head (at 1.0 or 0.58  $\mu\text{g/mL}$ ), and trimeric stem (1.0 or 0.44  $\mu\text{g/mL}$ ) for coating corrected by concentration or molecular weight and possible binding sites of the antibodies to the protein. The solid line represents the 1  $\mu\text{g/mL}$  and the dotted line shows the binding of plasma and mAbs with the adjusted coating to molecular weight. mAb CR8020 was used as a negative control.

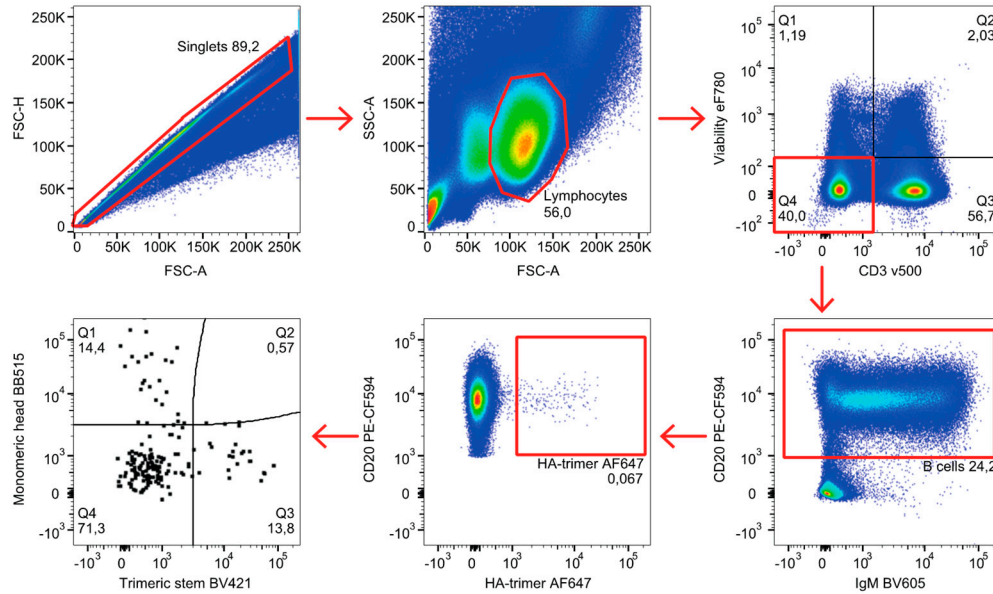

**Figure S3: Flow cytometry gating strategy.** Flow cytometry gating strategy example of HA-trimer specific B cells in healthy donors. The gating was performed by selecting cells using the following parameters: singlets, lymphocytes, CD3- and viability- (excluding dead cells and T cells), CD20+ and IgM+/- (B cells), and HA-trimer+. The lower left panel reveals the head and stem specific B cells among the HA-trimer+ cells.

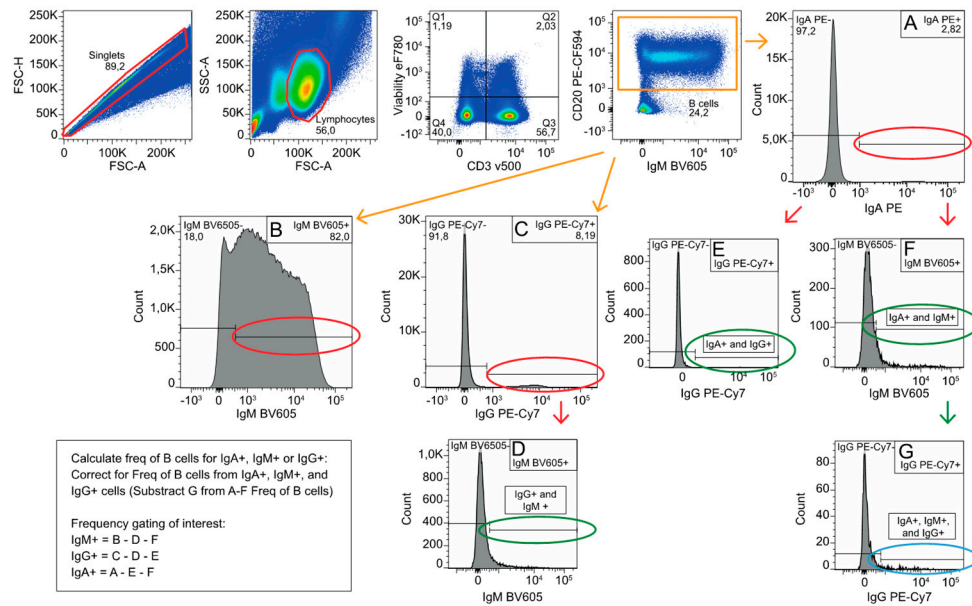

**Figure S4: Gating strategy and calculation of isotype frequency.** The frequencies of the gates were taken for the population of interest, e.g. B cells (yellow). First a correction was made for cells that were positive for all three isotypes (IgA+, IgM+, and IgG+, in G, blue). Next, the cells that had two isotypes (D, E, and F in green) were excluded to obtain the percentage of B cells per isotype, e.g. IgA, IgM, or IgG (A, B, and C in red). Unclassified B cells were double/triple positive or negative for all isotypes. The same strategy was used for the isotypes of HA-trimer positive cells, and for monomeric head, trimeric stem, and trimer-only cells.

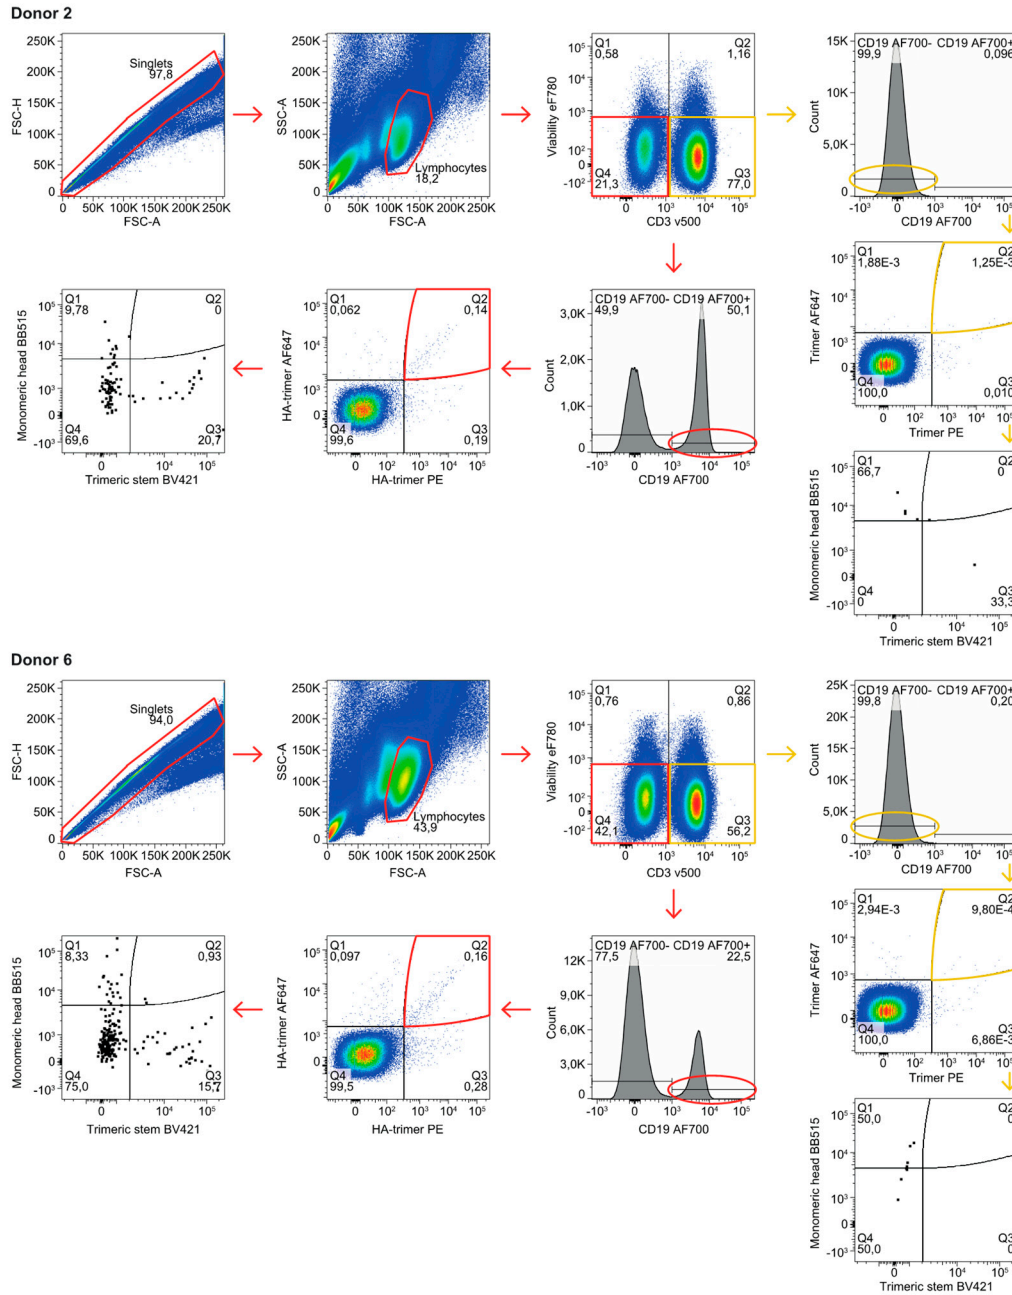

**Figure S5: Flow cytometry analysis of an alternative double HA-trimer stain of PBMCs of two healthy donors.** The gating (in red highlighted) was performed by selecting the following populations and parameters: Singlets, lymphocytes, CD3- (UCHT1, BD Horizon), viability- (Invitrogen), CD19+ (HIB19, BioLegend), and HA-trimer+/. The head or stem binding cells can be observed within this double positive HA-trimer population. Alternative gating (in yellow highlighted) was performed on singlets, lymphocytes, CD3+, viability-, CD19-, and HA-trimer +/+. This gating was performed to evaluate non-specific binding of the HA probes to sialic acids on CD3+ cells.

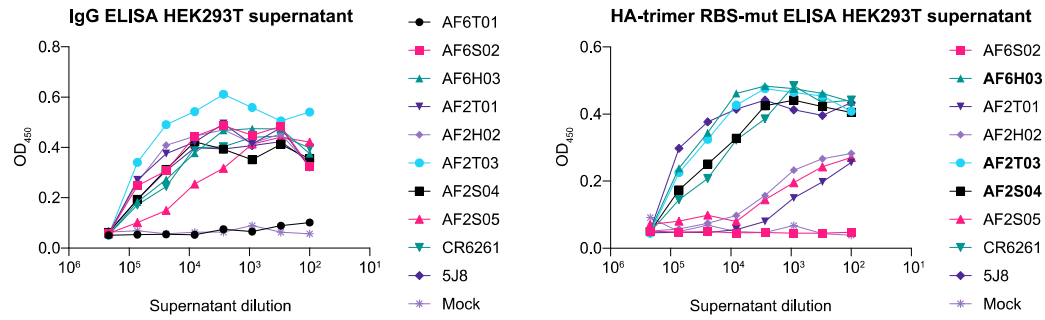

**Figure S6: Antibody expression and binding pattern in HEK293T cells.** HEK293T cells were co-transfected with expression vectors for the heavy and light chain and the supernatant was tested in an IgG ELISA (left) and a Strep-Tactin XT ELISA coated with HA-trimer RBS-mut (right). AF6T01 was negative in the IgG ELISA and therefore excluded from the HA-trimer ELISA. The three antibodies selected for further analysis are highlighted (AF6H03, AF2T03, and AF2S04).

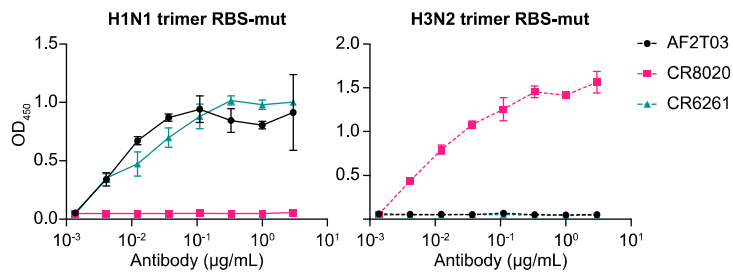

**Figure S7: Excluding nonspecific tag-binding of AF2T03 mAb.** Biotinylated HA-trimer RBS-mut from H3N2 (A/Netherlands/213/2003) and H1N1 (A/Netherlands/602/2009) were coated on a Strep-Tactin XT ELISA, The binding of mAbs AF2T03, CR6261, and CR8020 was evaluated in duplicates to each of the proteins.

**Table S1: V-usage and CDR3 sequence and length of the isolated mAbs.** V-usage and CDR3 sequence and length obtained from IMGT/V-QUEST database (program version: 3.5.25, reference directory release: 202118-1)

| Antibody name | V-usage    | CDR3 amino acids   | CDR3 length |
|---------------|------------|--------------------|-------------|
| AF2T03        | IGHV3-30   | AKDVSIAARYFDD      | 13          |
|               | IGKV3-15   | LQFNKWPPLT         | 10          |
| AF2S04        | IGHV1-69   | ARDRDDSTFGL        | 11          |
|               | IGKV1-5    | QQSNTFSRT          | 9           |
| AF6H03        | IGHV3-30-3 | ARGGGVNVDTVMCNYFDY | 18          |
|               | IGKV1-33   | QQYDNLPIT          | 9           |

**Table S2. Frequency of each domain within the HA-trimer population for all B cell isotypes combined and separately.** Cells with more than one isotype were not excluded, mean of six HDs.

| Binding domain | All isotypes (Fig. 2E) | IgM- | IgM+ | IgA+ | IgG+ |
|----------------|------------------------|------|------|------|------|
| Head           | 14.7                   | 16.3 | 13.1 | 11.7 | 21.9 |
| Head+stem      | 3.5                    | 2.3  | 4.8  | 0.7  | 4.1  |
| Stem           | 14.3                   | 18.6 | 12.6 | 34.7 | 25.7 |
| Trimer-only    | 67.5                   | 62.8 | 69.5 | 52.9 | 48.3 |
